# Supplementary material for: Reduced Anthocyanins in Petioles codes for a GST anthocyanin transporter that is essential for the foliage and fruit coloration in strawberry
Source: PubMed Central journal article supplement (PMC5920330; doi:10.1093/jxb/ery096), 2018-03-10
Supplement: ery096_suppl_supplementary_figures_and_tables.pdf [file ery096_suppl_supplementary_figures_and_tables.pdf]

# ***RAP* codes for a GST anthocyanin transporter that is essential for the foliage and fruit coloration in strawberry**

Huifeng Luo<sup>1</sup>, Cheng Dai<sup>2</sup>, Yongping Li<sup>1</sup>, Jia Feng<sup>1</sup>, Zhongchi Liu<sup>1,3</sup>, and Chunying Kang<sup>1\*</sup>

1. Key Laboratory of Horticultural Plant Biology (Ministry of Education), College of Horticulture and Forestry Sciences, Huazhong Agricultural University, Wuhan, 430070, China

2. College of Plant Science and Technology, Huazhong Agricultural University, Wuhan, 430070, China

3. Dept. of Cell Biology and Molecular Genetics, University of Maryland, College Park, MD, 20742, USA

\*To whom correspondence should be addressed. Tel. +86 13871595425. E-mail: ckang@mail.hzau.edu.cn

## **SUPPLEMENTARY DATA**

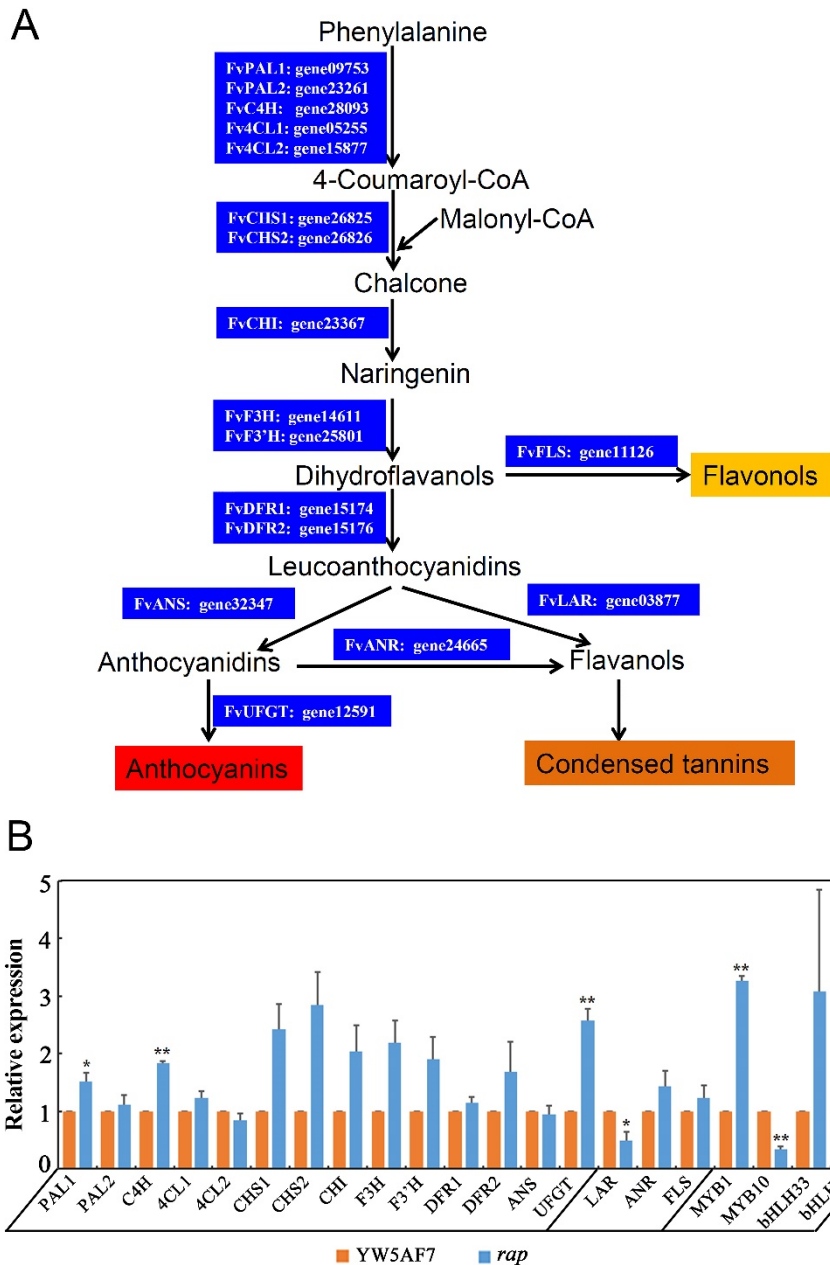

**Figure S1. Anthocyanin biosynthetic genes in *F. vesca* and their expression level in *rap*.**

(A) A diagram showing genes coding for catalytic enzymes in anthocyanin biosynthesis pathway in *F. vesca*. The diagram was adapted from Pillet *et al.*, J Exp Bot, 2015. (B) Expression level of the catalytic enzyme and regulatory genes in anthocyanin biosynthesis pathway in the petioles of YW5AF7 (wild type) and *rap* analyzed by qRT-PCR. Y-axis indicates the relative expression level, which was respectively set to 1 in YW5AF7 for each gene. *Gene11892* was used as the internal control. Data are means $\pm$ SD obtained from three technical repeats. \*\*,  $P < 0.01$ , student's *t*-test. The experiment was repeated twice with similar results.

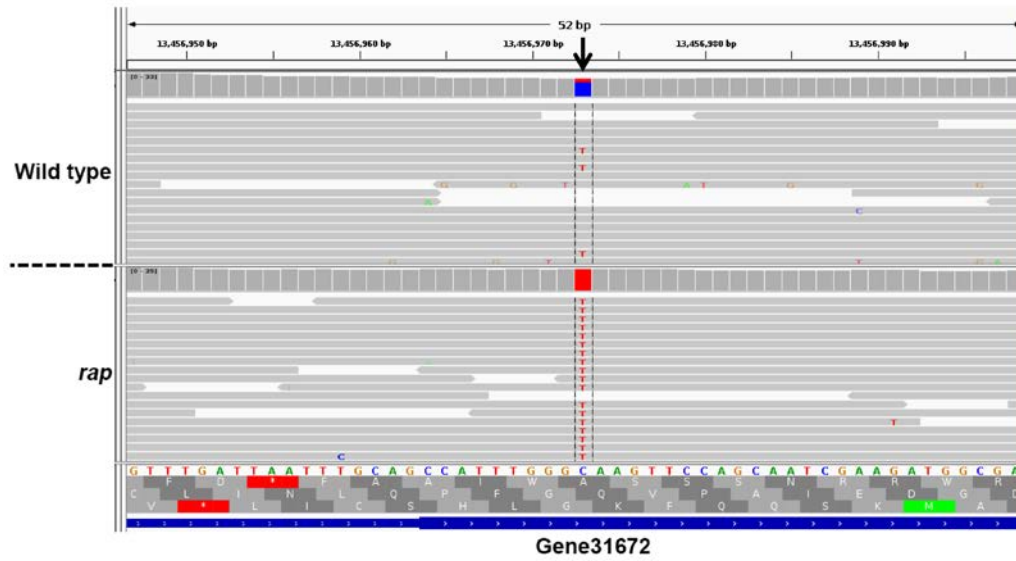

**Figure S2. IGV view of the causative SNP of *rap* in gene31672.**

Gray bars indicate aligned reads derived from genome resequencing of the wild type and *rap* mutant groups, respectively. Black arrow points to the SNP in the second exon of gene31672, where the wild type C in blue was mutated into T in red.

### Figure S3. Genomic sequences of *RAP* and its paralogs.

The genomic sequences from translation start site (ATG) to stop codon for these genes are shown as following. Blue shades indicate exons. Yellow shades indicate introns.

#### >*RAP-gene31672*

```
ATG G T A C T G A A A G T T T A T G G T C C A G T T A G G G C A G C C T G C C C C A G A G G G T G A T G G T T T G C C T T T T G G A G C T A G G G G T T G A G T T T
G A G A T T G T G C C T G T T G A T C T T C A A G C A G G A G A G C A A A A G C A A C C T C A C A T T C T T G C T C G A C A G T A A A T A T T A A C A G T C T A G C
A A C A T A A T T G C A T C A A A T T A C A C A C A T A C A T G T C G G C A T A T A T T T G A C T G T T T G A T T A A T T T G C A G C C A T T T G G G C A A G T T C C A
G C A A T C G A A G A T G G C G A T T T C A A G C T T T T T G G T A T G G G G G G A T G A T A T G C A T A C A T A C A T A C T T G T T A C T T T C T T A A T T T G G G T
C T T T T T T G G A A G T C C A T G A A A A A A G T A G T C C T T G C A A A A T G G C A A T A C A A T A T C A G C A G T T G A A A T T G T G A C C A A G T C C A
A A A T G T T A T T G A T A A T T G G T T A T C A A G A G A T T A A C T A G C T A G G T A T A A C T A G T A T A G T A A T A C T G T A C G T A T C T T G G A A T A A G A T G T
T C A A A G T C T T G T T G C T G T A T G C C T T C A T T A A C C C G A T T T C T G G C T C T C G C T C T G C T A C A C A G A A A T C T A G A G C T A T C G T A A G A T A
C T A T G C G G C T A A G T A T G C A G A G C G T G G T C T A A C C T G C T A G G A C A A C A C T G G A G G A G A A G G C A C T G G T G G A T C A A T G G C T C G
A A G T C G A A T C A C A C A A C T C A A C G A C T T G G T T T T C A C T G T G G T A C T T C A A C T T G T G A T C C T C C C A G C A T G G G C C A A C C T G G C G
A C T T G G C C T T G G T G C G T C T T T G T G A A G A A A A A C T G A A A A A G G T A T T C G A T G T G A T G A G G A G A G A C T G T C C A A G A G C A C C T A T
C T G G C C G A A A C T A C T T C A G T T T G G C T G A T C T G A G C C A T C T C C G G C G A T T C G G T T T C T G G T T G A C G A G T T C A A A A T G G G A C A T
T T G A T C A C G G A G A G A A G A A T G T G A A T G C T T G G T G G A A G A T A T T C C A A T A G G C C T G C A T G G A A G A A A C T A T G A A G C T T G C
T C A A T A C T A G
```

#### >*RAP-L1-gene28763*

```
ATG G T G T A A A G G T G T A T G G C C C C T C A T A T G C T T C T C T A A A C G A G T T C T A G T G T G T C T T G T T G A G A A G G A G A T T G A G T T T G A A
A C C A T C C C C A T T G A T C T T T T C A A G G G A G A A C A T A A A G A T C T G A A T T C C T C A A A T T A C A A G T A A T C A C T T T G T G A T T C A T A T C C A T
C A T C A T T C T A T A T C T G T T T G T T A C T T G G T G G T T G A T C G T T T G C A T T G T C T T C T T T C A T G T A G C C T T T G G A G C A G T T C C T G T
T A T T C A A G A T G G G G A T T A T A C T T T A T A T G G T A T C A C T T G A A A T G A G C T T T C A T G T A C T G T T T G A T T A T T G T T G T T G T T C A T G T G
C T T A A T A T A C T T A T T T G A A T A T G T A G T T C A G A T T G A G T G A C C A T T T A T T T C C T T T C T G G T T G C C T C T G A A T T T G C A G A A G T T T A G
A A A A C A G T T A T A C C A A G A T T T T A A G A T A C A A C T C A A T T A T T T C A T C G T A A C A A G A C A T A G C A T T C C A T A T C A G A G G G G A A C T
A T A A G T C T T T T G G T T T A C A A G A C G T A G C A T T T C A T A T C A G T G G T T T T A C T T A A C T T T T A T T T G A A T T A T C T G G A A T A T C A A A T T
A G C A T T G G A A T G T T T T C T G A T A G A C T A C T T T A G T T C C T T T C A A T C C T A A T T T A T T G A A T A A A G T C A T T C A A A T T T G A T T T T G C A G
A A T C A C G G G C A A T T A T A A G A T A C T A C G C A G A A A A G T A C A A G T C A C A A G G G A C T G A T T T G C T A G G A A A G A C G A T T G A G G A A A G
A G G C C T T G T G G A A C A A T G C C T A G A G G T T G A A G C T C A A A A C T A C C A C C C A T C A A T T G A C A A C T G G T C A T T C A C A T T T T G T T T G C
C C C A G T C C A G G G T T C C C T T C A G A C C C A A A G A T A A T T C A A G A G A G T G A A G A G A A G T T A G G C A A G G T T G G A T G T T A T G A G G
A G A G G C T A T C A A A G A G C A A A T A T T G G C T G G T G A T T T T C A G C C T T G T G A T C T T A G C C A C C T T C C A T T T A C A C A G T A C T A T T G G T
G G G T G C T G T A G G G A A A G A C T A C A T G A T A A A G A G C A G A A A G C A T G T C T C A G C T T G G T G G G A T G A T A T T A G C A A C A G G C C A T C G T
G G A A G A A G G T G C T C G A G T T C G T G C C C C A T T T T A A
```

#### >*RAP-L2-gene08595*

```
ATG G C G A C T C C C G T G A A A G T G T A C G G G C C A C C G A T A T C C A C C T G C G T G T C G A G G G T G T T G G C C T G T C T C C T T G A G A A A G A A G T
G C C C T A T C A G C T C A T T C C G G T C A A C A T G G C C A A A G G C G A G C A C A A G A A G C C T G C A T A C C T C A A G A T C C A G G T A T C T T T A T A C T C
C C A C A T T T A C A A T G A A C A T A T T C T G T T G A A T T C T A T T G T T T T C T T T T C A A C T G T A A C A G C C A T T T G G A C A A G T C C C G G G T T T T
G A A G A C G A T G G C T T C A C C G T G T C G G T A T G T A T A T A T A T G C T T C A A T G C A T G G A A T T A G A T T G T G G A T G T G G G G T T G A T T T G T T C
T A C A T G T C T T G G T A G T A A T T G T G A T T T C A G A A T C A A G G T C G A T A T G C C G G T A C A T A T G T A A G T A T G C A A A G C A G G
G A A A C A A G G G C T T G T A T G G G G A C A A C C A T T G G C A A A G G C C T C C A T A G A T C A G T G G C T A G A A G C C G A A G G A C A A A G C T T C A G
C C C T C A A G C T C G G T T C T G G T G T T C C A G C T T G C A T T C G C G C C A A G A A T G A A G C T G A A G C A G G A T C A A G T G G C G A T C A G G C A G A
A C G A A G A G A A G C T G A A G A A G G T G C T G G A C G T G T A C G A A G A G A G G C T A A G T G A G A G C C G G T T C T T G G C G G G T G A C G A G T T C A
C T C A G C C G A C C T T T C T C A C T T G C C C A A C A C A C A C T A C T T G G T C A A T G C A A C A G A T A T A G G A G A G C T G T T T A C A G A G A G A G A A T
G T G T G G G C A G G T G G T G G G C T G A G A T A T C T A G C C G A G A G T C G T G G A A G A A G G T G G T T G A A A T G C A G A A G C C T T G A
```

#### >*RAP-L3-gene22014*

```
ATG G G A C T C A A G C T T C A T G G C C T T G C T C T C T C A A C A T G C A C T G C T C G T G T C A C C A C C G C C A T T A C G A G A A A G G G C A G G A A T T
C G A G C T C A T C C C T G T T A A C C T T A C C A C C G G A G A A C A C A A G C A G T C A G G T T T C C T T G C C A A A A A T G T A A G A A C A T C A T G T A A C A T
T A T G T C T G C A T A T A T A T T T T C C G A C A A G G T A A G C T T T G A T C C A A T C T G A C A T G G T G T T G T T T G T T G A T G A T T T G C A G C C C
T T T G G T C A A A T T C A G C C C T A G A G G A T G G T G A T C T A C T C T T T T T G G T A A T C T T T C C T T T C C C T A T T G C A G T G A T T T A A G A A T T T
C A T A T A T T A G A A G A T G A T G A C A A T T C A G A C A A A G C T A G C A T G G A T T G G C C A A A A G T A G C A A C A T T A A T G A A T A C T C T C A T C C G G C
C A T G A A A A T G T G A T T A A T T C C G G C A A A C A T A C C A G A A T A A A A T T C A A A A C C T G T T T T A G G A G T A A T C T G G T C T T T T G G C C T A G
T G A T A C A A T T C A T A T G A T T T T A G A T T G G T T T G A A A A T A T T G A A G T A T T T G A G G T A T G A T A C T G T A G T A T A T G T T T G T A G C T T T T A C
T A T C C A T G C A T A C T C A G T T A G C A T A T C T G T G G A A T G A A C A T T G A C A G A G T C A G A G C C A T T G C A T C A T A T G T T G C C G A A A A G T A C
A A G G A C T C T G G T T C T G A T C T C A T C A G G C A C A C A A C C T C A A G G A A G C T G C A C T T G T C A A G G T G T G G T C G G A G G T G G A G G C T C
A G A C C T T C C A C C G G T A A C T C C A C A T T G T C C A C C A C A C T C A T T C C C A T T G T T G G A C A G C A G C A G C A C C A A G C A G T G A
T C G A T G C A A A C C T G G A G A A G C T C A A G A A C A T C C T C A A T G T C T A T G A C G C G A G G T T G A A G A G C A G C A A G T A C T T G G C A G G A G A
T T T C T T C A G C A T C G C G A T C T T A A C C A C T T T C C T A C C T T T T C T A C T T C A T G A G G A G C C C T T G G A C T T C G G T G G T G A A T G A T C G T
C C T C A T G T G A A A G C C T G G T G G G A G G A C A T T T C T T C A A G G C C A A G C T T C A A G A A A G T A G C T G A G G G A A T G G C C T T A G G T C A G A
A G T A G
```

#### >*RAP-L4-gene10549*

```
ATG G T G C T C A A G C T G C A T G G A C T T T C T G T G T C G A C C A A C A C A G C T C G T G T C G T G G C T T G T C T A C A T G A G A A A G A T G T C G A T T T C
C A G C T T G T C C C G G T T G A T C T C T T T G C C C G T G G A A A C A A G G A G C C T T C T T T C T T G C C A A G A A T G T A A G T T T C T T T C C C A T G C T T
```

GTATTACAAGCTTATAATTCATTCTATCATATATAAGCTCATTTCGACTGTTAGCAGTCGTTAATTCGTATATATGTTTGTTC  
AATCCTCTATCTTGCAGCCCTTTGGCCAGATTCCAGTATTAGAAGATGGTGACATCACTCTTTTTGGTAAGCATGTTAGATTACTT  
CTTCATTATTTGATAAAATTTCAAATTTGATGACTTAGATATACAACATAATTTTGTCTCACCATCTGTTGATTTTTGTTACACCAG  
AATCTAGGGCAATCTCATCTACATAGCAGAAAAATTCAAGGAAACCGAACCGATCTCATACGGCAGGAAAGCTTCAGTGAA  
GCTGCACTGGTGAAGGTTTGGACAGAAAGTTGAATCCCAACAATACCACCCAGCAATCTGTCCATTATATACGAGTTTTTCGGA  
AAGCCAGTGCAAGGCTTGGAAACCAGACCAGGCAGTGATAGATGCAAATTTGGAGAAGCTAGAGATGGTGCTCGATGTTATGA  
GGCCAAGCTGAGCAGCACCAGTACCTTGTGGTGATTCTACAGCCTAGCCGATCTTACCATTCCCTTACACTTTTTACTTC  
ATGAAGACTCCTTTGGGCTCAGTGATCAGTGATCGCTCATGTTAAGGCCCTGGTGGGATGACATTACAGCTAGGCCTGCTTTG  
AAGAAAGTTGCTGAGGGTATGACTTTCGGTGAGAATCAGTGA

### >RAP-L5-gene10550

ATCGCCGGCATCAAAGTCCATGGAACCGTATGTCAACTGCAGCAGCGGAGTTTTGGCTACCCTCTACGAGAAAAGAGGTGGA  
AATTGAGCTTGTCCGATAGACATGAGAGCCGGTGAACATAAAAAGGACTCCTTCCTTGCCTCAATGTAAGTTTCTTGAAATG  
AAAACAGAGTTGCTTTTGGCATGTTTTCTCTTTGATTCTTACCTCTTAATTTGTTGTAATCAATCCAGCCATTGGTCAAGTTC  
CAGCTTTTGAAGACGGAGATCTTCAGCTCTTTGTAAGTTTCTGCTTAGCTCAGCCACATCAAATTCCTCAGCATATATAAAT  
TGTGTTTGCAGCTTTGTATGATTGTATCTAAGATTCTAAGATGCCAACCTTGTGAATGCAGAGTCAAGAGCAATTACACAATAC  
ATTGCCCATGAGTATGCTTCAAAGGGAACCCCGCTGATAGTCCAGACTCGAAGAAGATGGCAATCTATCAGTGTGGACAGA  
GGTGGAGGCACAAAAGTTCCGACCTGCAGCCTCAAACCTGACATATGAGCTAGTAATAAACCTCTCTATGGCACGGTCACTG  
ACTTCGAGTCTGTGGAGGAATTCGAAGCTAAGTTGGGTACAGTTCTCGATGTCTATGAGAAAACGCTCTGGGACAATCGAAATAC  
TTGGGAGGTGATTGCTCAGCTTGGCAGATCTTACCACCTTCCAACCTACACAATACTTGTATGGGAACACAAGCCAAGAAGCT  
CTTTGAGTGCCCGCCGAATGTTAGCGCATGGGTAGCTGATATCACTGCCAGGCCTGCTTGGACTAAAAGTCTCGCCATGAGAG  
TCACTAA

### >RAP-L6-gene10551

ATCGCCGGCATCAAAGTCCATGGAACCGTTTTCTCTACTGCAGCAGCGGAGTTTTGGCTACCCTCTACGAGAAAAGAGGTGGA  
AATTGAGCTTGTCCGATAGACATGAAAGCCGGTGAACATAAGAAGGAGTCTTCCTTGCCTCAATGTAAGTTTCTTGAAATG  
AAAACAGTTGCTTTTGGCATGTTTTCTCCTTGATGTTCTTACCCTCTTAATTTGTTGTAATCAACCCAGCCATTGGTCAAGT  
TCCAGCTTTTGAAGACGGAGATCTTCAGCTCTTTGTAAGTTTCTGTTTAGCTCAGCCACATCAAATTCACACAGCACATGTATA  
TTGTTTGTGACTTTGTATCTAAGATGCCAACCTTGTGAATGCAGAGTCAAGAGCAATTACACAATACATTGCCATGAGTACG  
CTTCAAAGGGAACCCCGCTGATAGTCCAGACTCGAAGAAGATGGCAATCTATCAGTGTGGACAGAGGTGGAGGCACACAA  
GTTCCGACCTGCAGCCTCAAACCTGTCATATGAGCTAGCAATAAAGCCTCTCCTTGGCATGGTCACTGACTTCGCAGTCTGTGA  
GGAATTCGAAGCTAAGTTGGGTACAGTTCTCGATGTCTATGAGAAAACGCTCTGGGACAATCGAAATATTTGGGAGGTGATTGCTT  
CAGCTTGGCAGATCTTACCACCTTCCAACCTACACAATACTTGTATGGGAACACAAGCCAAGAAGCTCTTTGAGTGCCGTCCGA  
ATGTTAGCGCATGGGTAGCTGATATCACTGCCAGGCCTGCTTGGACTAAAAGTCTCGCCATGAGAGCTCACTAA

### >RAP-L7-gene10552

ATCGCAGCAGAAGGCAGAAAGCTGTACGGCGACCTGAACACACCGGAAACCTTGAAGGTTGTGGCATGCCTGTTTCGAACATG  
ATCTTGATTTGAGTTTGTTCCAATCAATCTTGAAGCCAACCAACACAGGGAAAAACAATTTCTTCTATGAGTGTAAGTACTTA  
ATTGACTATATAAATACTTATAATCATGCATTTTCTTAAATATGTATCCATTATTCTGATATAATCAATGAAATATAACTGGATCGTGTA  
GCCCTTTGGTAAATGCTGTCTTGGAAAGATTGGTAAGCATATGCATTCAATCACTTTGGACTCTGATGAAATTAAGTTGTTGA  
TTAATTCTGATAAATTTGGTAGTTAAAGCCTTAGTTTACGTTCCCGGCCAGTAATGAAGTAATATGTTGTTGCAGAAGCCACAACG  
ATAGTAAGATACATGGGTCATATGTATGCAAATAAGAAGAAAGTGGGAGAAGAGCTTATCTTCTGGGAGTCACATAAACAAGCC  
TTGGTGGCTAATTTGGATTGATGTGGAAGACCACTACTTTGAACCACCAGCACTCAAGCTCATATCGTTGTTGTCAGTAACAAG  
GCTATCGACGATGTCGGCGAGTCCAATGGTGTGATCGTGAATAGATGAACCTGAGCCAAGTTCTGGATGTGACGAGGCCAG  
CTGGGAGGTTCAAGTACCTGGCGAGTGACAAGTTACCCTGCTGATGTTCTTACCTCCCAAACTTGCACAGCCTTATGGG  
AATCGCTCGACTAAGAAGCTCATAGATTCGCGTCTCATGTCAGTGCTTGGTGCTCTGAGATTCTTGCTCGCCCTTATGACC  
AAGGTGCTTCAGATGAAGAAACAGAAGATGATCTCTTAGCCTAG

(a)

```

FvRAP-L7 1 MAAEGRKLYGDLNTPETLKVVAQLFEHDLDFEFVPI NLEANQHREKQFLS MSV----- KATTLVRYMGHM
FvRAP-L5 1 --MAGIKVHGTAMSTAAARVLATLVEKEVEFELVPI DMRAGEHKKDSFLALNPF GQVPAFEDGDLQLFESRAI TQYI AHE
FvRAP-L6 1 --MAGIKVHGT VFS TAAARVLATLVEKEVEFELVPI DMKAGEHKKESFLALNPF GQVPAFEDGDLQLFESRAI TQYI AHE
FvRAP-L3 1 ---MGLKHLGLALS TCTARVITAIYKGEFEFLVPI NLT TGEHKSQGF LAKNPF GQVPAFEDGDLQLFESRAI ASYV AAK
FvRAP-L4 1 ---MVLKHLGLSVS TNTARVVACLHEKDVDFQLVPI DL FARGNKEPSFLAKNPF GQVPAFEDGDLQLFESRAI SSYT AAK
FvRAP 1 ---MVLKVVGPVRAACPQRVAVCLLELGVFEFLVPI DLQAGEGKQPHI LARQPF GQVPAFEDGDFKLFESRAI VRYV AAK
FvRAP-L1 1 ---MVVKVVGPSY-ASPKRVLVCLVEKEFEFETIPI DLF RGEHKKDPEFLKLPF GAVPVI QDGDYTLFESRAI RYV AAK
FvRAP-L2 1 -MATPVKVVGPPTSITCVSRVLAACLEKEVPTQIIPVNMARGEHKKPAYLKI QPFGQVPGFEDGDFVLFESRSI GRVY CDK

FvRAP-L7 66 YANKKKVCEELTFWES- HKQALVANWLDVE DHYFEPPALKLISLSSNKAIDVVGESNGVDRVIDEISQVLDVYFAQLGR
FvRAP-L5 79 YASK--GTPLI VPS- KKMALLSVWTEVEAQKEDPAASKLTYELVTKPLYETVTDFAVVEEFAKLGTVLDVYEKRLGQ
FvRAP-L6 79 YASK--GTPLI VPS- KKMALLSVWTEVEAQKEDPAASKLTYELVTKPLYETVTDFAVVEEFAKLGTVLDVYEKRLGQ
FvRAP-L3 78 YRDS--GS DLRHNHLKKAALVKVWSEVEAQT EHPVISTIVHQLLPLFCQQPQAVI DANLEKLNINNVYDARLKS
FvRAP-L4 78 YKET--GTDLRHESFSEAALVKVWSEVESQOYHPAICPIIYEFFGKPVQCLEPQAVI DANLEKLEMLVDVYAKLSS
FvRAP 78 YAEF--GPN-LLGTILEKALVDQWEEVSHNNDLVFTVVLQVILPSCQPGDLALVRSCEEKLVKVVLDVYERLSK
FvRAP-L1 77 YRSQ--GTD-LLGKTIERGLVEQWEEVAQYHPISIDNLVIHLFLAPVQCFPSDPKIIEESEKLGKVLVDVYERLSK
FvRAP-L2 80 YAKQ--GNKGLYGDNP LAKASTDQWLEAEQSSPSPSVLFVQLAFARMKLKOQVAIRONEEKLKLVLDVYERLSE

FvRAP-L7 145 FKYLASDKITVADVHL PNLHSLVGLASTKKLIDSRPHVSAWCS EILARPSTWIKVLOMCKKQKMSLA
FvRAP-L5 155 SKYLGDCFS LADLHLPTTCYLVGT- QAKKLFECRPNVSAWADI TARPATWIKVLAHRAH-----
FvRAP-L6 155 SKYLGDCFS LADLHLPTTCYLVGT- QAKKLFECRPNVSAWADI TARPATWIKVLAHRAH-----
FvRAP-L3 155 SKYLAGDFSLADLHLFPYLFYFVRS- PWTSVVNDRPHVRAWEDI SSRPSFKKVAEGMALGOK----
FvRAP-L4 155 TKYLAGDFYS LADLHLFPYLFYFVKT- PLGSVLS DRPHVRAWDDI TARPALKKVAEGMTFGENQ--
FvRAP 154 STYLAGNYFSLADLSHLPAIRFLVDFKMGHLITERKNVNAWKKDISNRPAWKKLMKLAQY-----
FvRAP-L1 153 SKYLAGDFSLADLSHLPFTTCYLVGAVGKDYMLKSRKHSVAWDDI SNRPSMKKVLVFGAPF-----
FvRAP-L2 157 SRYLAGDFSLADLSHLNPTHYLVNATDIGELFTEKCVGRWAEISRSLSMKKVVEMQKP-----

```

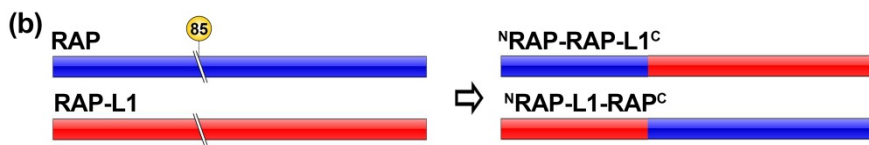

**Figure S4. Amino acid sequence alignment of RAP and its paralog.**

(A) Amino acid sequence alignment of RAP and its 7 paralog in *F. vesca*. The number before each row represents the position of the first amino acid. Identical amino acids are highlighted with black, while conservative substitutions are marked with gray. (B) Design of the chimeric proteins between RAP and RAP-L1 shown in Fig. 6. The length of the two proteins is exactly the same. Their N- and C-termini are switched. N-terminus is from the 1<sup>st</sup> to the 85<sup>th</sup> amino acid, while C-terminus is from the 86<sup>th</sup> to the last amino acid.

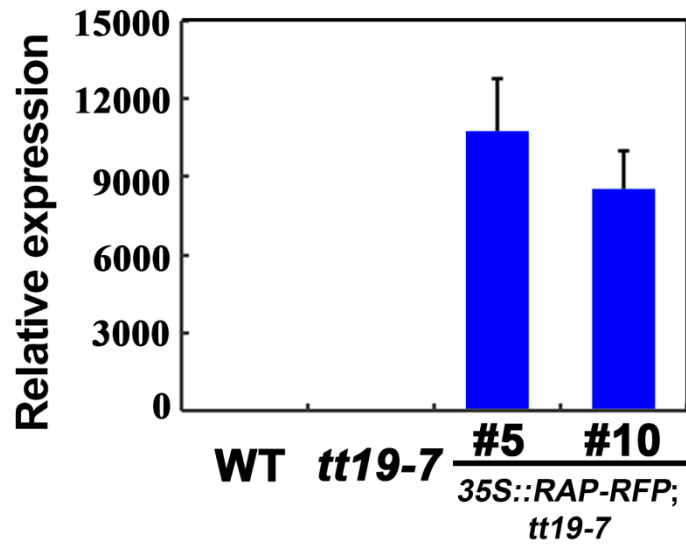

**Figure S5. Genotyping of the *35S::RAP-RFP* transgenic lines in *Arabidopsis tt19-7*.**

Relative expression level of *RAP* in leaves of WT, *tt19-7*, and two transgenic lines of *35S::RAP-RFP* (L5, L10) in the *tt19-7* background was shown examined by qRT-PCR. *Actin2* (At3g18780) was used as the internal control. Data are means  $\pm$  SD obtained from three technical repeats.

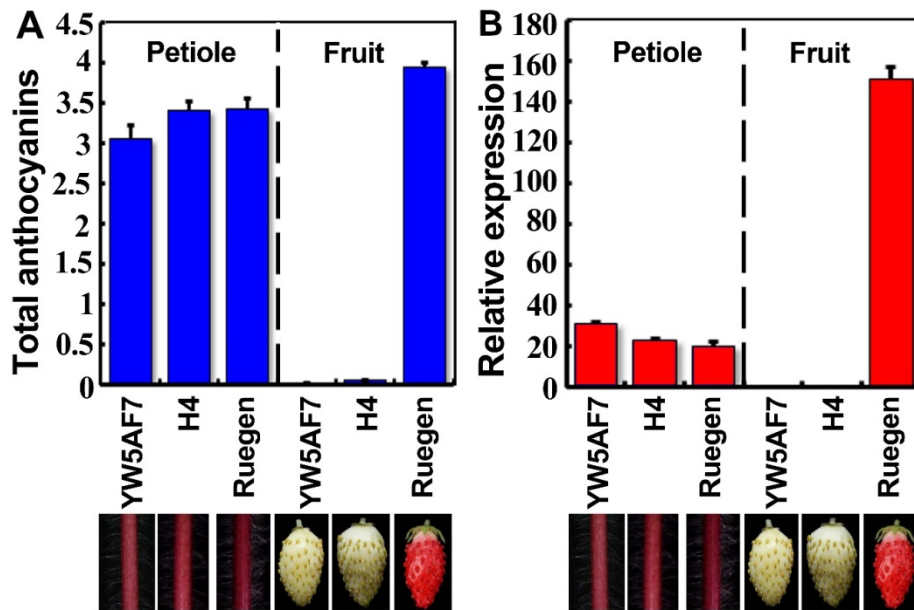

**Figure S6. Total anthocyanin contents and expression level of *RAP* in petioles and fruits of the three *F. vesca* varieties.**

(A) Total anthocyanin contents in the petioles of mature leaves and the mature fruits of *F. vesca* varieties YW5AF7, H4, and Ruegen, respectively. The unit of total anthocyanin contents in Y-axis is  $(A_{530}-0.25 \cdot A_{657}) \text{ g}^{-1}$ . (B) Expression level of *RAP* in the petioles of mature leaves and the mature fruits of *F. vesca* varieties YW5AF7, H4, and Ruegen, respectively. *Gene11892* was used as the internal control. Data are means  $\pm$  SD obtained from three technical repeats. The experiment was repeated twice with similar results.



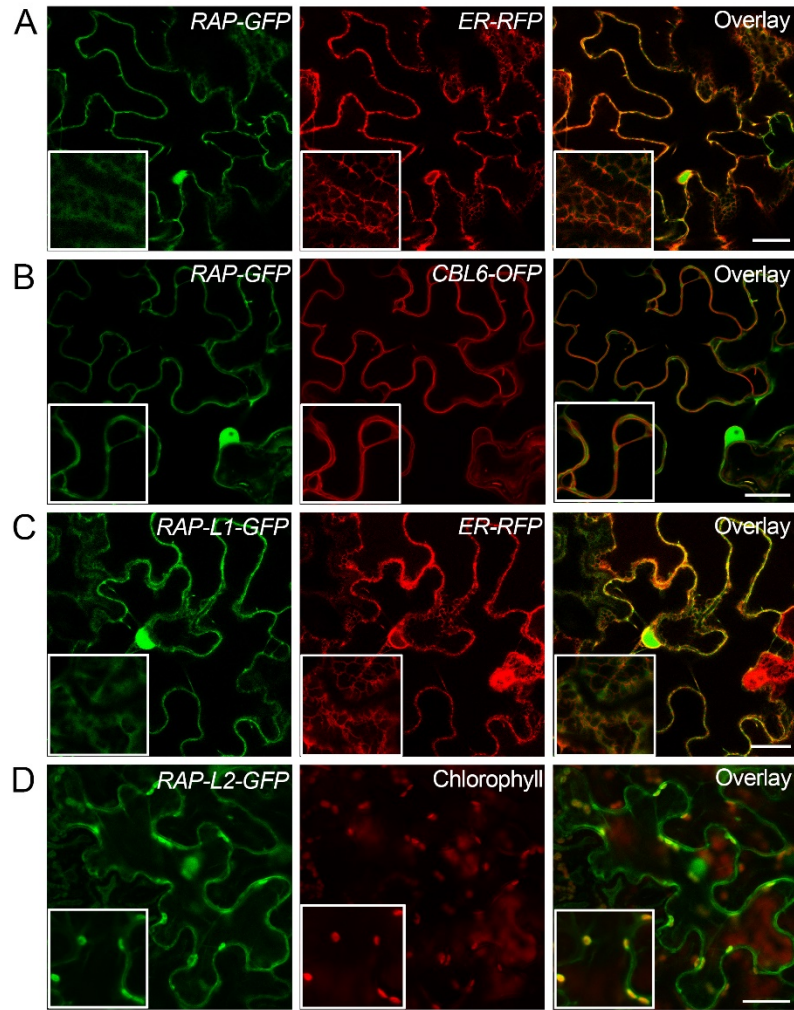

**Figure S7. Subcellular localization of RAP and its paralogs in tobacco epidermal cells.**

(A) and (B) Confocal images of *RAP-GFP* (green) co-expressed with *ER marker-RFP* (red) or tonoplast marker *CBL6-OFP* in tobacco epidermal cells, respectively. (C) Confocal images of *RAP-L1-GFP* (green) co-expressed with *ER marker-RFP* (red) in tobacco epidermal cells. (D) Confocal images of *RAP-L2-GFP* (green) with chlorophyll autofluorescence (red). Inset is the enlarged image of either the same or a different cell. Bar =25  $\mu\text{m}$ .

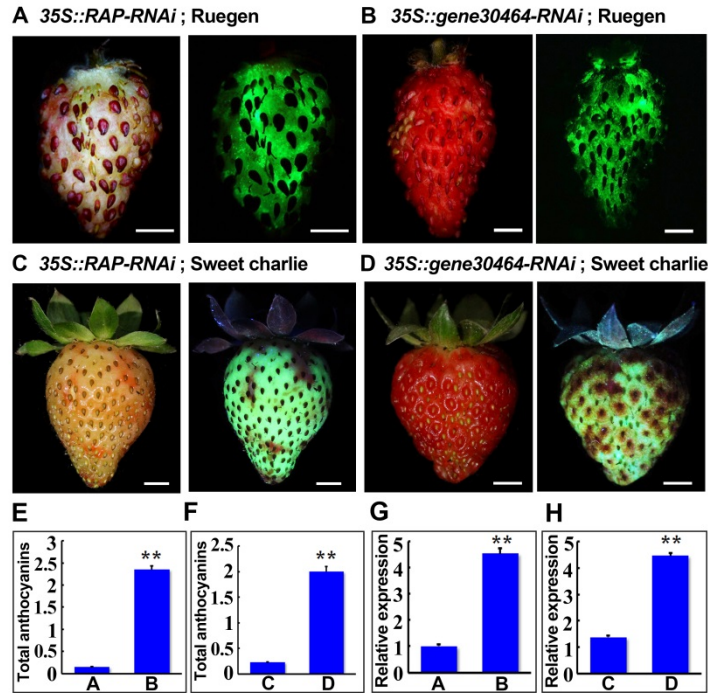

**Figure S8. Transient knock-down of *RAP* reduces fruit coloration in *F. vesca* and *F. ananassa*.**

(A) One fruit of Ruegen infiltrated with 35S::*RAP-RNAi*. (B) One fruit of Ruegen infiltrated with 35S::*gene30464-RNAi* (control). (C) One fruit of Sweet Charlie infiltrated with 35S::*RAP-RNAi*. (D) One fruit of Sweet Charlie infiltrated with 35S::*gene30464-RNAi* (control). At least 10 fruits were used for each construct with similar results. The green fluorescence is from the 35S::*GFP* cassette in the vector. (E) and (F) Total anthocyanin contents in the fruits shown in (A) to (D). The unit of total anthocyanin contents in Y-axis is  $(A_{530} - 0.25 \cdot A_{657}) \text{ g}^{-1}$ . (G) and (H) Expression level of *RAP* in the fruits shown in (A) to (D) examined by qRT-PCR. *Gene11892* was used as the internal control. Data are means  $\pm$  SD obtained from three technical replicates. \*\*,  $P < 0.01$ , student's *t*-test. The experiment was repeated for three times with similar results. Bar = 3 mm in (A) and (B). Bar = 5 mm in (C) and (D).

**Figure S9. Promoter sequence of *RAP*.**

**>Promoter of *RAP*-gene31672 (1,114 bp)**

Green shade indicates C1 motif/MYB binding site. Yellow shade indicates R motif/G-box.

```
TTTAGACCGCCCTATCATTATTCAATCCTCTACAGTTCCATGCCAAGATCTCCATGAACAACCTAGAATCGATGCCAAAACGAAA  
CTCTAGCAGAGCACAGCGTTTTCTATACTCGATGCCAAGCTTTAACTAATTAACCTTAAAATACACAATGGCTTTGGGAAAAGC  
CCATTGGACTATATAGAGCCCAAGCTAGCCTATTTAATGTTATTGTAGTCTTTGAAATGATCTCAGCATGCACTTTGATGCATTTA  
CCACTCGCTCATTGTCCAAATTAATGGAGGTTTTCAAGTGGCTATATTATGGTTTTTCAGTGGTACCTTTTACAACCTATTAAC  
GTACGCACATTTGGTTTGCTTCTCATGAATCCAAGCTAGGGGGCAATATATACGTACGAAATGCAATTCTCTTCTCATGAAGATG  
AAGATGAAGATGAAGGTAATCGGGTAACACACGTACTCTTGCACATAATGCAATTTGCTTCTATAAATGCAACACATACACTG  
TGGCTCACACAAAAGTGCCATCTATTTTGACATTGTCAATGATTAATTACGTGTATATTTTCATCCAAGACATATATATAGGTG  
AGTAAGGCTTTAGCTTATTGAGTCTTGCATGTGATCTGCCGGGCGGCCGGGCATGTGCTAACCCCAAGGCTAAGGCCACTATT  
CGTAACAAATACCTAATTCGATTAATTAGTAGTGATCGAGTGAATGAATCTCTGTGACGACGTATTCCTATACCATCCACTCCTG  
ATTTTTGTCCCTTTTCTTTCTTGTGAGGTGTGACAAGTACATTATAACAGTACGTGCTCCTTATAAATTGGCATATGTATGA  
GTATGGCTGGCTAAACTAGTCACGTGTGGAAGGTGGCAACCCCGGGTTGTTTCATCATCTTGGTAATAATAAGGTCCCATATA  
TGCTTTCAATTAGTAATATATAGTGGCCATCTGATAGCTGCTTCAGTGCTTCATGCATACCTCTATATATATAAGCGAGACTAAA  
CCCCAAACAATCCCAATACAGCTACTGAACGATTCTTGTGCTCTGATACTACTTATTACCGCCAGTTTTTCTTTACAGCTCG  
CAG
```

**Table S1. The list of primers used for making constructs.**

| <b>Construct</b> | <b>Primer name</b>     | <b>Primer sequence (5'-3')</b>                             |
|------------------|------------------------|------------------------------------------------------------|
| gRAP::RAP        | B1-Gene31672-co-F      | GGGGACAAGTTTGTACAAAAAAGCAGGCTTTAGACCCGCCTATCATTATTC        |
|                  | B2-Gene31672-co-R      | GGGGACCACCTTTGTACAAGAAAGCTGGGTGAATTCACATAGTAGAGTACTTAC     |
| 35S::RAP-RFP     | B1-Gene31672-F         | GGGGACAAGTTTGTACAAAAAAGCAGGCTATGGTACTGAAAGTTTATGGT         |
|                  | Gene31672-RFP-R        | AGGAGGCCATGTATTGAGCAAGCTTCATAAGT                           |
|                  | Gene31672-RFP-F        | TGCTCAATACATGGCCTCCTCCGAGGACGTC                            |
|                  | B2-RFP-R               | GGGGACCACCTTTGTACAAGAAAGCTGGGTTTAGGCGCCGGTGGAGTGGCGC       |
| 35S::RAP-RNAi    | B1-Gene31672-RNi-F     | GGGGACAAGTTTGTACAAAAAAGCAGGCTACAGCTCGCAGATGGTACTGAAAG      |
|                  | B2-Gene31672-RNi-R     | GGGGACCACCTTTGTACAAGAAAGCTGGGTGGAAGATGGCTCAGATCAGCCAAA     |
| 35S::RAP-L1      | B1-Gene28763-ox-F      | GGGGACAAGTTTGTACAAAAAAGCAGGCTATGGTGGTAAAGTGTATGGCCCT       |
|                  | B2-Gene28763-ox-R      | GGGGACCACCTTTGTACAAGAAAGCTGGGTAAAAATGGGGACCGAACTCGAG       |
| 35S::RAP-L2      | L1-EcoRI- gene08595-F  | ACTGGATCCGGTACCGAATTCATGGCGACTCCGGTGAAGTGTAC               |
|                  | L2-EcoRI-gene08595-R   | CTCGAGTGGCGCCGGAATTCCTCAAGGCTTCTGCATTTCAACCAC              |
| 35S::RAP-L3      | B1-Gene22014-ox-F      | GGGGACAAGTTTGTACAAAAAAGCAGGCTATGGGACTCAAGCTTCATGGCCCT      |
|                  | B2-Gene22014-ox-R      | GGGGACCACCTTTGTACAAGAAAGCTGGGTCTACTTCTGACCTAAGGCCATTCCC    |
| 35S::RAP-L4      | B1-Gene10549-ox-F      | GGGGACAAGTTTGTACAAAAAAGCAGGCTATGGTGTCTCAAGCTGCATGGACTT     |
|                  | B2-Gene10549-ox-R      | GGGGACCACCTTTGTACAAGAAAGCTGGGTCACTGATTCTACCGAAAGTCAT       |
| 35S::RAP-L5      | B1-Gene10551-ox-F      | GGGGACAAGTTTGTACAAAAAAGCAGGCTATGGCCGCATCAAAGTCCATGGAA      |
|                  | B2-Gene10551-ox-R      | GGGGACCACCTTTGTACAAGAAAGCTGGGTAAAGTGTCTCATGGCGAGGACT       |
| 35S::RAP-L7      | L1-EcoRI-gene10552-F   | ACTGGATCCGGTACCGAATTCATGGCAGCAGAAGGCAGAAAGCTG              |
|                  | L2-EcoRI-gene10552-R   | CTCGAGTGGCGCCGGAATTCCTAGGCTAGAGAGATCATCTTCTG               |
| 35S::MYB10       | B1-Gene31413-ox-F      | GGGGACAAGTTTGTACAAAAAAGCAGGCTATGGAGGGTTATTCGGTGTGAGA       |
|                  | B2-Gene31413-ox-R      | GGGGACCACCTTTGTACAAGAAAGCTGGGTCTATACGTAGGAGATGTTGACTAGATCA |
| 35S::RAP-RAP-L1  | B1-Gene31672-F         | GGGGACAAGTTTGTACAAAAAAGCAGGCTATGGTACTGAAAGTTTATGGT         |
|                  | 31672-28763-R          | TCGTCTTTCCAGGTTAGGACCACGCTCTG                              |
|                  | 31672-28763-F          | TCCTAACCTGGGAAAGACGATTGAGGAAAG                             |
|                  | B2-Gene28763-ox-R      | GGGGACCACCTTTGTACAAGAAAGCTGGGTAAAAATGGGGACCGAACTCGAG       |
| 35S::RAP-L1-RAP  | B1-Gene28763-ox-F      | GGGGACAAGTTTGTACAAAAAAGCAGGCTATGGTGGTAAAGTGTATGGCCCT       |
|                  | 28763-31672-R          | TTGTCCTAGTAGCAAATCAGTCCCTTGTG                              |
|                  | 28763-31672-F          | TGATTTGCTACTAGGAACAACACTGGAGGA                             |
|                  | B2-Gene31672-R         | GGGGACCACCTTTGTACAAGAAAGCTGGGTCTAGTATTGAGCAAGCTTCATAAG     |
| 35S::RAP-GFP     | P1-gene31672-NdeI-F    | TCTTCACTGTTGATACATATGATGGTACTGAAAGTTTATGGT                 |
|                  | P2-gene31672- EcoRI -R | GCCCTTGCTCACCATGAATTCGTATTGAGCAAGCTTCATAAGT                |
| 35S::RAP-L5-GFP  | P1-gene10550-NdeI-F    | TCTTCACTGTTGATACATATGATGGCCGCATCAAAGTCCATGGAA              |
|                  | P2-gene10550- EcoRI -R | GCCCTTGCTCACCATGAATTCGTGAGCTCTCATGGCGAGGACTT               |
| 35S::RAP-L2-GFP  | P1-gene08595-NdeI-F    | TCTTCACTGTTGATACATATGATGGCGACTCCGGTGAAGTGTAC               |
|                  | P2-gene08595-EcoRI -R  | GCCCTTGCTCACCATGAATTC AGGCTTCTGCATTTCAACCACCT              |
| 35S::RAP-L1-GFP  | P1-Gene28763-NdeI -F   | TCTTCACTGTTGATACATATGATGGTGGTAAAGTGTATGGCCCT               |
|                  | P2-Gene28763 EcoRI -R  | GCCCTTGCTCACCATGAATTCAAATGGGGACCGAACTCGAGCAC               |
| 35S::RAP-L3-GFP  | P1-Gene22014-NdeI -F:  | TCTTCACTGTTGATACATATGATGGGACTCAAGCTTCATGGCC                |
|                  | P2-Gene22014- EcoRI-R: | GCCCTTGCTCACCATGAATTCCTTCTGACCTAAGGCCATTCCCT               |
| 35S::RAP-L4-GFP  | P1-Gene10549-NdeI -F:  | TCTTCACTGTTGATACATATGATGGTGTCTCAAGCTGCATGGACTT             |
|                  | P2-Gene10549- EcoRI-R: | GCCCTTGCTCACCATGAATTCCTGATTCTACCGAAAGTCATACC               |

**Table S2. The list of primers used for qRT-PCR.**

| Gene name    | Gene ID         | Direction | Primer sequence (5'-3')     | Amplicon Size |
|--------------|-----------------|-----------|-----------------------------|---------------|
| FvPAL1       | gene09753       | Forward   | GGATCCAAAACGGTTCCTTGGACA    | 248bp         |
|              |                 | Reverse   | GGCAGACTCATCCAGTTCACACCTT   |               |
| FvPAL2       | gene23261       | Forward   | TGGCGCTTAACGGAAACGGAAA      | 166bp         |
|              |                 | Reverse   | GGCTTCGGTAGTCATTCAACCATT    |               |
| FvC4H        | gene28093       | Forward   | ACTTTATTCCCGTGCTCC          | 212bp         |
|              |                 | Reverse   | GACATTGCTCCTCGTTGAT         |               |
| Fv4CL1       | gene05255       | Forward   | CTCAAACAGCTACGTCGAA         | 113bp         |
|              |                 | Reverse   | CTCGGAGAAATGC AACACAT       |               |
| Fv4CL2       | gene15877       | Forward   | GAGGCCACAAGCACAACG          | 245bp         |
|              |                 | Reverse   | CTCACCACAAGGCAACC           |               |
| FvCHS1       | gene26825       | Forward   | AAGTCTGCAGCTAATGGGCACAAG    | 145bp         |
|              |                 | Reverse   | ACTCGAATGAACCCGGATGCCTTA    |               |
| FvCHS2       | gene26826       | Forward   | GAGACCGTTGTGTTACAG          | 149bp         |
|              |                 | Reverse   | GAATGCCCAAATGAAGATCA        |               |
| FvCHI        | gene23367       | Forward   | GTCGTTTCCTCCCTCCG           | 172bp         |
|              |                 | Reverse   | CGTCTGCCCTCCAC              |               |
| FvF3H        | gene25801       | Forward   | TCACGACGCTAACTTCTC          | 231bp         |
|              |                 | Reverse   | TTCACTACCTTTGACCCT          |               |
| FvF3H        | gene14611       | Forward   | TGTCCATAGCGACATCCAGAACC     | 188bp         |
|              |                 | Reverse   | CTCTGAATCCTGCAGTTGCTCCTT    |               |
| FvDFR1       | gene15174       | Forward   | CACGATTACGACATTGCGAAATT     | 139bp         |
|              |                 | Reverse   | GAACTCAAACCCCATCTCTTCAGCTT  |               |
| FvDFR2       | gene15176       | Forward   | CCGGACTTTCGCCTCTATT         | 118bp         |
|              |                 | Reverse   | GCTTTCGGATGCTCGTACA         |               |
| FvANS        | gene32347       | Forward   | GAAGTGGTACCCAATCCATCGT      | 117bp         |
|              |                 | Reverse   | ACCTTCTCCTTTGACGAGCCC       |               |
| FvUFGT       | gene12591       | Forward   | TTTGGTTCGGTGCTCATA          | 265bp         |
|              |                 | Reverse   | AGCATCTGTCCCATCTGGT         |               |
| FvLAR        | gene03877       | Forward   | ACAGAGGCGCCATCATCCTC        | 233bp         |
|              |                 | Reverse   | CATGGTCAGACCCGGTTCCA        |               |
| FvANR        | gene24665       | Forward   | TGAAGGGAGCTTTGATGCTGCT      | 120bp         |
|              |                 | Reverse   | ACTCCTTGGACTCCTGGCTTG       |               |
| FvFLS        | gene11126       | Forward   | TGATCTTGCTCTTGGTGTGGTT      | 150bp         |
|              |                 | Reverse   | TCACCAATGTGGATGACTAGGG      |               |
| FvMYB1       | gene09407       | Forward   | ATGAGGAAGCCCTGCTGCGA        | 235bp         |
|              |                 | Reverse   | AACGACGCAACCCATGCAGCC       |               |
| FvMYB10      | gene31413       | Forward   | TGGCATCATGTTCTCTCAAA        | 235bp         |
|              |                 | Reverse   | CTCTGCAAACTCTCTCTCTTG       |               |
| FvbHLH3      | gene27827       | Forward   | TGACGACGCCTCCAACAAC         | 228bp         |
|              |                 | Reverse   | GGTGGAGACCGTTCCGAGT         |               |
| FvbHLH33     | gene19321       | Forward   | AATCTTCTCTGCTCCTC           | 169bp         |
|              |                 | Reverse   | TCTTCATCATGTCCACGT          |               |
| FvRAP        | gene31672       | Forward   | CAAGTTCAGCAATCGAAGA         | 211bp         |
|              |                 | Reverse   | TGGGAAGGATCACAAAGTTGA       |               |
| FvRAP-L1     | gene28763       | Forward   | ACAACCCCTTTGGAGCAGTTC       | 200bp         |
|              |                 | Reverse   | CCAAGTTGTCAATTGATGGG        |               |
| FvRAP-L2     | gene08595       | Forward   | CAAGAAGCCTGCATACCTCA        | 131bp         |
|              |                 | Reverse   | TGTTCCCTGCTTTGCATAC         |               |
| FvRAP-L3     | gene22014       | Forward   | CTCTCAACATGCACTGCTC         | 148bp         |
|              |                 | Reverse   | TCTAGGGCTGGAATTTGACC        |               |
| FvRAP-L4     | gene10549       | Forward   | AGAATCCCTTTGGCCAGATT        | 196bp         |
|              |                 | Reverse   | CAGATTGCTGGGTGGTATTG        |               |
| FvRAP-L5/6   | gene10550/1     | Forward   | AGCCGGTGAACATAAGAAGG        | 140bp         |
|              |                 | Reverse   | TTCCCTTTGAAGCGTACTCA        |               |
| FvRAP-L7     | gene10552       | Forward   | GGATGTGTACGAGGCCAGC         | 187bp         |
|              |                 | Reverse   | GGTCCATGAAGGGCGAGCAA        |               |
| FvRAP-RAP-L1 | gene31672-28763 | Forward   | AGAGGGTGATGGTTTGCCTT        | 131bp         |
|              |                 | Reverse   | TTCGATTGCTGGAACCTTGCC       |               |
| FvRAP-L1-RAP | gene28763-31672 | Forward   | GGCTCGAAGTCAATCACAC         | 170bp         |
|              |                 | Reverse   | GGTGCTCTTGGACAGTCTCT        |               |
| Housekeeping | gene11892       | Forward   | AGCCTAACGCAGAGGTTCCAAA      | 136bp         |
|              |                 | Reverse   | GCAGCCCAACATTGAAGGGTCTATAGT |               |
| Actin2       | At3G18780       | Forward   | TCCCTCAGCACATTCAGCA         | 135bp         |
|              |                 | Reverse   | GATCCCATTCATAAAACCCAGC      |               |
